# Supplementary material for: Magnetic Characteristics of Copper Ion-Modified DNA Thin Films
Source: PubMed Central journal article supplement — Sci Rep. 2013 May 10;3:1819. doi: 10.1038/srep01819 (PMC3650661; doi:10.1038/srep01819), 2013-05-10

## Supplementary Information

### Magnetic Characteristics of Copper Ion-Modified DNA Thin Films

Sreekantha Reddy Dugasani<sup>1,2</sup>, Namhoon Lee<sup>1</sup>, Junwye Lee<sup>2</sup>, Byeonghoon Kim<sup>2</sup>,

Si Un Hwang<sup>2</sup>, Keun Woo Lee<sup>1,2</sup>, Won Nam Kang<sup>1\*</sup>, Sung Ha Park<sup>1,2\*</sup>

<sup>1</sup>Department of Physics

Sungkyunkwan University, Suwon 440-746, Korea

<sup>2</sup>Sungkyunkwan Advanced Institute of Nanotechnology (SAINT)

Sungkyunkwan University, Suwon 440-746, Korea

\* Correspondence and requests for materials should be addressed to W.N.K and S.H.P.

E-mails: [wnkang@skku.edu](mailto:wnkang@skku.edu) (W.N.K.); [sunghapark@skku.edu](mailto:sunghapark@skku.edu) (S.H.P.).

**Figure S1.** The AFM image and  $m$ - $H$  curves of DNA on mica

**Figure S2.** Schematic diagram of DX tiles.

**Figure S3.** Schematic diagram of  $\text{Cu}^{2+}$  adding before and after annealing.

**Figure S4.** AFM images of  $\text{Cu}^{2+}$ -DNA grown on glass

**Figure S5.**  $M$ - $T$  curves of copper on PG.

**Table S1.** Sequencing pool for DX tiles.

**Table S2.** Sets of sticky-ends for DX tiles

**Figure S1.** (a) The AFM image (scan size,  $2.5 \mu\text{m} \times 2.5 \mu\text{m}$ ) of DNA on mica. Dotted lines on an image indicate crystal domain boundaries. (b)  $m$ - $H$  curves of pure mica and the DNA thin films with  $5 \text{ mM } [\text{Cu}^{2+}]$  (Cu5) on the mica substrate.

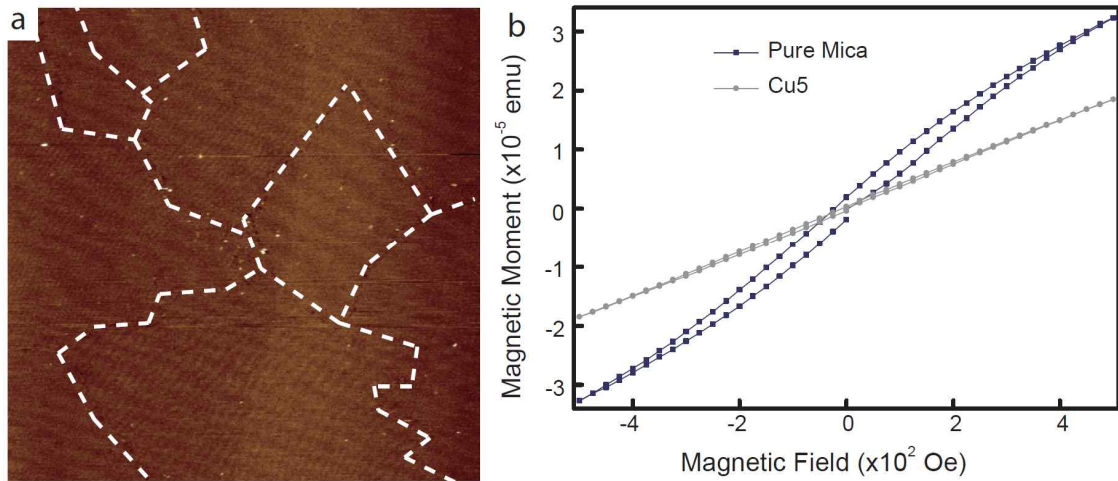

**Figure S2.** A schematic diagram of the double-crossover (DX) [DX = (DX-1) + (DX-2)] tiles. Each tile consisted of four strands DX1-1, DX1-2, DX1-3, and DX1-4 for (DX-1) tile and DX2-1, DX2-2, DX2-3, and DX2-4 for (DX-2). The complementary sticky end pairs are shown as  $S_n$  and  $S_n'$  in sequence drawings (blue).

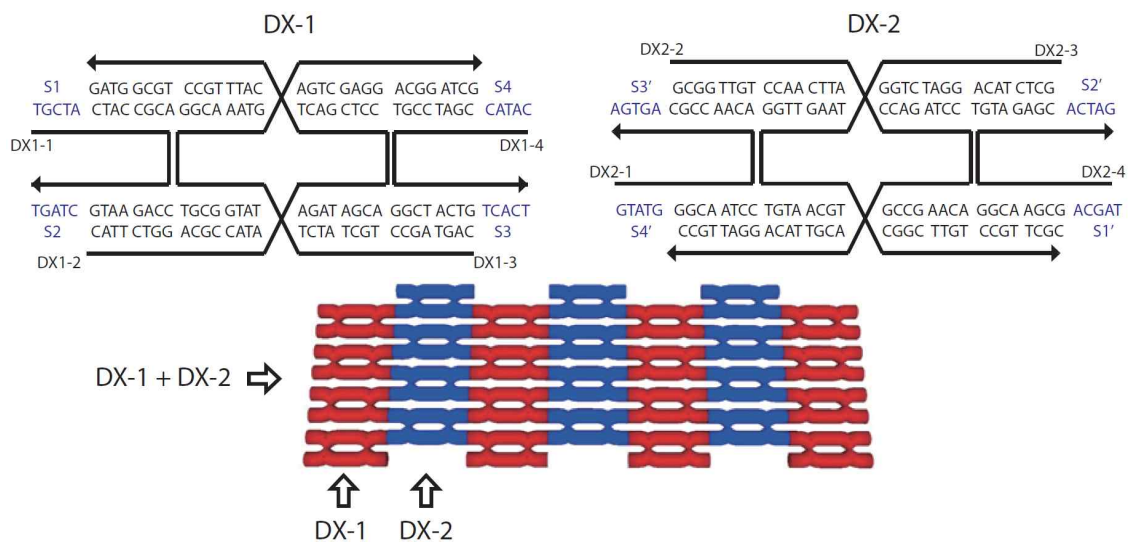

**Table S1.** Sequence pool for the double-crossover (DX) tiles

| Strand | Total # of NTs | Sequence (5' to 3')                                      |
|--------|----------------|----------------------------------------------------------|
| DX1-1  | 26             | TGCTA CTACCGCA CCAGAATG CTAGT                            |
| DX1-2  | 48             | CATTCTGG ACGCCATA AGATAGCA CCTCGACT CATTGCC<br>TGCGGTAG  |
| DX1-3  | 48             | CAGTAGCC TGCTATCT TATGGCGT GGCAAATG AGTCGAGG<br>ACGGATCG |
| DX1-4  | 26             | CATAC CGATCCGT GGCTACTG TCACT                            |
| DX2-1  | 26             | GTATG GGCAATCC ACAACCGC AGTGA                            |
| DX2-2  | 48             | GCGGTTGT CCAACTTA CCAGATCC ACAAGCCG ACGTTACA<br>GGATTGCC |
| DX2-3  | 48             | GCTCTACA GGATCTGG TAAGTTGG TGTAACGT CGGCTTGT<br>CCGTTCCG |
| DX2-4  | 26             | TAGCA GCGAACGG TGTAGAGC ACTAG                            |

**Table S2.** Sticky-ends for the double-crossover (DX) tiles shown in **Figure S2**

|    | 5' to 3' | 3' to 5' |     |
|----|----------|----------|-----|
| S1 | TGCTA    | ACGAT    | S1' |
| S2 | CTAGT    | GATCA    | S2' |
| S3 | TCACT    | AGTGA    | S3' |
| S4 | CATAC    | GTATG    | S4' |

**Figure S3.** The schematic diagram of  $\text{Cu}^{2+}$  adding (**a**) before and (**b, c**) after annealing.

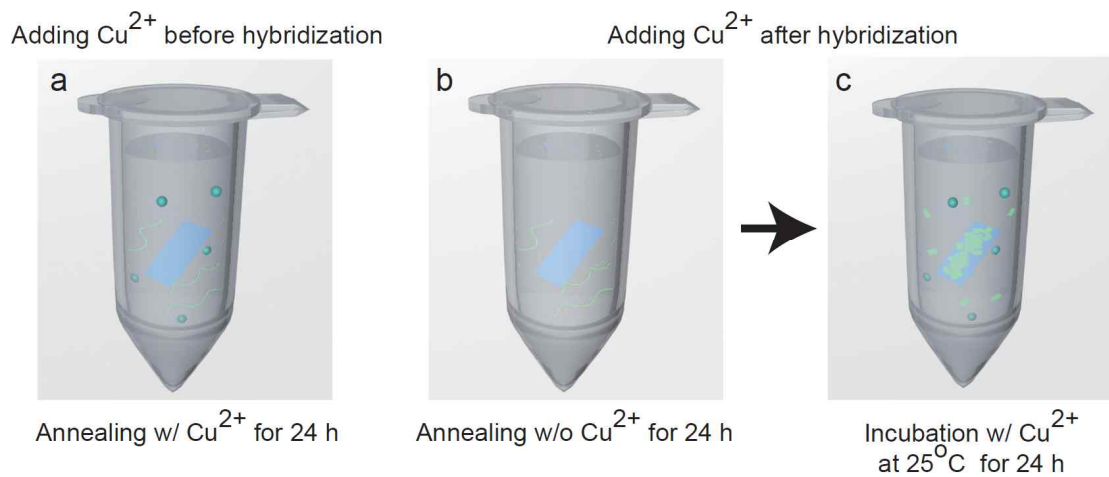

**Figure S4.** (a-f) The AFM images of the DNA thin films with 3, 5, 6, 8, 10 and 15 mM  $[\text{Cu}^{2+}]$ . The  $\text{Cu}^{2+}$  was added after hybridization. All AFM image scan sizes were  $2.5 \times 2.5 \mu\text{m}^2$ .

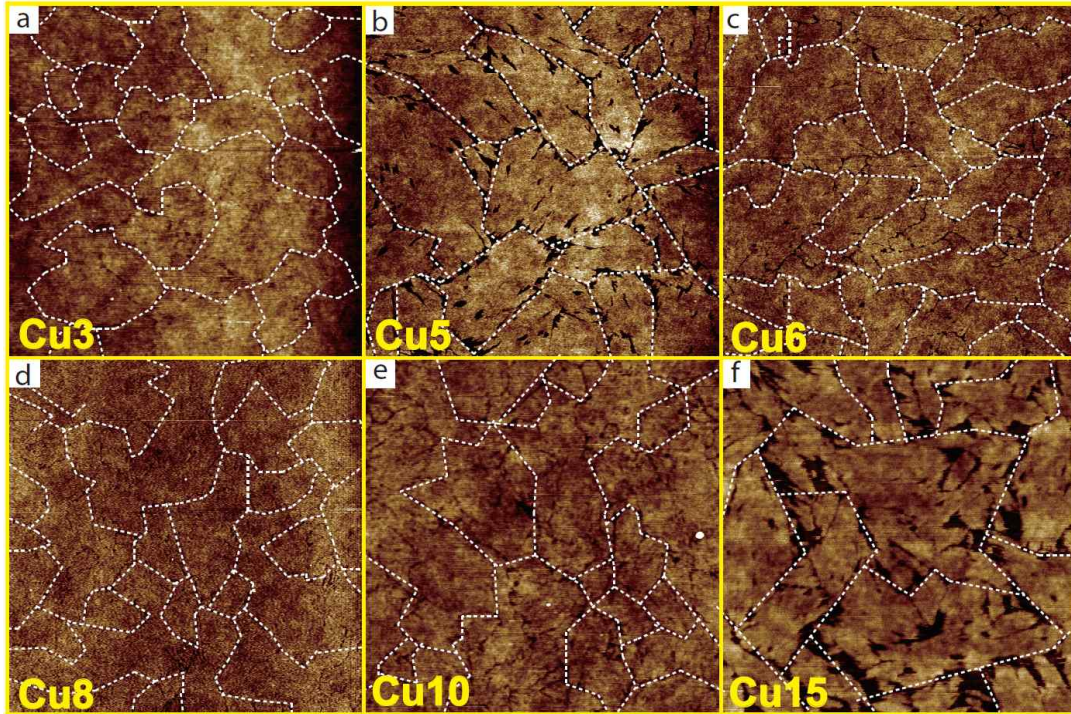

**Figure S5.** The variation of magnetization with temperature for piranha-treated glass (PG) (inset) and 5 mM of  $\text{Cu}^{2+}$  (Cu5) on PG without DNA thin films.

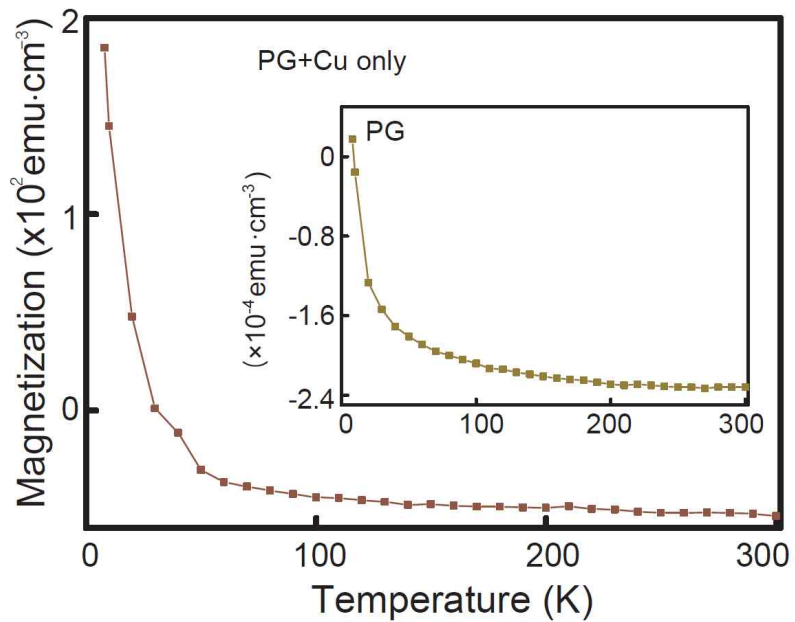

Supplement: srep01819-s1.pdf [file srep01819-s1.pdf]
